# Supplementary material
Source: PubMed Central journal article supplement (PMC6393186)
Supplement: NIHMS989375-supplement-Supp_TableS1.pdf [file NIHMS989375-supplement-Supp_TableS1.pdf]

**Supplemental Table 1:** Strains and number of mice

| <b>Strains</b>                 | <b>128a</b> | <b>120a</b> | <b>46</b> | <b>35</b> | <b>5</b> | <b>19</b> | <b>163</b> | <b>122b</b> | <b>131b</b> | <b>18</b> | <b>6</b> | <b>33</b> | <b>SM</b> | <b>LG</b> |
|--------------------------------|-------------|-------------|-----------|-----------|----------|-----------|------------|-------------|-------------|-----------|----------|-----------|-----------|-----------|
| Cartilage degeneration         | 3           | 3           | 3         | 3         | 3        | 3         | 3          | 3           | 3           | 3         | 10-11    | 8         | 5         | 5         |
| Synovitis                      | 3           | 3           | 3         | 3         | 3        | 3         | 3          | 3           | 3           | 3         | 10-11    | 8         | 5         | 5         |
| Bone parameter                 | 3           | 4           | 4         | 3         | 3        | 3         | 5          | 3           | 6           | 3         | 3-8      | 3-9       | 4         | 5         |
| SCB plate-thickness            | 3           | 4           | 4         | 3         | 3        | 3         | 5          | 3           | 6           | 3         | 3-4      | 3-5       | 5         | 5         |
| Synovial ectopic calcification | 3           | 4           | 4         | 3         | 3        | 3         | 5          | 3           | 6           | 3         | 3-4      | 3-5       | 5         | 5         |

SCB = subchondrals bone
