# Supplementary material
Source: PubMed Central journal article supplement (PMC6393186)
Supplement: NIHMS989375-supplement-Supp_TableS2.pdf [file NIHMS989375-supplement-Supp_TableS2.pdf]

**Supplemental Table 2:** Genes tested for expression by QuantiGene Plex assay

| <b>Gene symbol</b> | <b>Name</b>                                                        |
|--------------------|--------------------------------------------------------------------|
| <i>Csmd1</i>       | CUB and Sushi multiple domains 1                                   |
| <i>Axin2</i>       | axin 2                                                             |
| <i>Kif26b</i>      | kinesin family member 26B                                          |
| <i>Vegfa</i>       | vascular endothelial growth factor A                               |
| <i>Rasl11b</i>     | RAS-like, family 11, member B                                      |
| * <i>Gapdh</i>     | glyceraldehyde-3-phosphate dehydrogenase                           |
| <i>Pnpo</i>        | pyridoxine 5'-phosphate oxidase                                    |
| <i>Copz2</i>       | coatamer protein complex, subunit zeta 2                           |
| <i>Snx11</i>       | sorting nexin 11                                                   |
| <i>Col2a1</i>      | collagen, type II, alpha 1                                         |
| <i>Col1a1</i>      | collagen, type I, alpha 1                                          |
| <i>Gdf5</i>        | growth differentiation factor 5                                    |
| * <i>Hprt</i>      | hypoxanthine guanine phosphoribosyl transferase                    |
| <i>Rrp15</i>       | ribosomal RNA processing 15 homolog ( <i>S. cerevisiae</i> )       |
| <i>Lrrc46</i>      | leucine rich repeat containing 46                                  |
| <i>Timp3</i>       | tissue inhibitor of metalloproteinase 3                            |
| <i>Acan</i>        | aggrecan                                                           |
| <i>Wnt16</i>       | wingless-type MMTV integration site family, member 16              |
| <i>Spata17</i>     | spermatogenesis associated 17                                      |
| <i>G0s2</i>        | G0/G1 switch gene 2                                                |
| <i>Skap1</i>       | src family associated phosphoprotein 1                             |
| <i>Igf1</i>        | insulin-like growth factor 1                                       |
| <i>D1Pas1</i>      | DNA segment, Chr 1, Pasteur Institute 1                            |
| <i>Teddm1</i>      | transmembrane epididymal protein 1                                 |
| <i>Cbx1</i>        | chromobox 1                                                        |
| <i>Mrpl10</i>      | mitochondrial ribosomal protein L10                                |
| <i>Casp3</i>       | caspase 3                                                          |
| <i>Grid2</i>       | glutamate receptor, ionotropic, delta 2                            |
| <i>Trpm3</i>       | transient receptor potential cation channel, subfamily M, member 3 |
| <i>Tbx21</i>       | T-box 21                                                           |
| <i>Mtor</i>        | mechanistic target of rapamycin (serine/threonine kinase)          |
| <i>Nfe2l1</i>      | nuclear factor, erythroid derived 2,-like 1                        |
| <i>Stab2</i>       | stabilin 2                                                         |
| <i>Hoxb9</i>       | homeobox B9                                                        |
| <i>Pon2</i>        | paraoxonase 2                                                      |
| <i>Tgfb2</i>       | transforming growth factor, beta 2                                 |
| <i>Syn3</i>        | synapsin III                                                       |
| <i>Comp</i>        | cartilage oligomeric matrix protein                                |
| <i>Pcna</i>        | proliferating cell nuclear antigen                                 |
| <i>Sgce</i>        | sarcoglycan, epsilon                                               |
| <i>Gda</i>         | guanine deaminase                                                  |

---

|                 |                                                                        |
|-----------------|------------------------------------------------------------------------|
| <i>Fam63b</i>   | family with sequence similarity 63, member B                           |
| <i>Bcl3</i>     | B cell leukemia/lymphoma 3                                             |
| <i>Fam81a</i>   | family with sequence similarity 81, member A                           |
| <i>Ihh</i>      | Indian hedgehog                                                        |
| <i>Htr1a</i>    | 5-hydroxytryptamine (serotonin) receptor 1A                            |
| <i>Scfd2</i>    | Sec1 family domain containing 2                                        |
| <i>Gmcs</i>     | GDP-mannose 4, 6-dehydratase                                           |
| <i>Fam105b</i>  | family with sequence similarity 105, member B                          |
| <i>Lnx1</i>     | ligand of numb-protein X 1                                             |
| <i>Adam10</i>   | a disintegrin and metallopeptidase domain 10                           |
| <i>Cas1</i>     | CAS1 domain containing 1                                               |
| <i>Pon1</i>     | paraoxonase 1                                                          |
| <i>Smyd 3</i>   | SET and MYND domain containing 3                                       |
| <i>Fip11</i>    | FIP1 like 1                                                            |
| <i>Oxgr1</i>    | oxoglutarate                                                           |
| <i>Scrn 2</i>   | secernin 2                                                             |
| <i>Il1r2</i>    | interleukin 1 receptor, type II                                        |
| <i>Sp6</i>      | trans-acting transcription factor 6                                    |
| <i>Fam105a</i>  | family with sequence similarity 105, member A                          |
| <i>Hs6st3</i>   | heparan sulfate 6-O-sulfotransferase 3                                 |
| <i>Tle3</i>     | transducin-like enhancer of split 3                                    |
| <i>Ank</i>      | progressive ankylosis                                                  |
| <i>Cdk5rap3</i> | CDK5 regulatory subunit associated protein 3                           |
| <i>Zfp648</i>   | zinc finger protein 648                                                |
| <i>Gpatch2</i>  | G patch domain containing 2                                            |
| <i>Map4k4</i>   | mitogen-activated protein kinase kinase kinase kinase 4                |
| <i>Bmp2</i>     | bone morphogenetic protein 2                                           |
| <i>Tgfb1</i>    | transforming growth factor, beta 1                                     |
| <i>Il1rl2</i>   | interleukin 1 receptor-like 2                                          |
| <i>Sp2</i>      | Sp2 transcription factor                                               |
| <i>Postn</i>    | periostin, osteoblast specific factor                                  |
| <i>Ppp1r9a</i>  | protein phosphatase 1, regulatory (inhibitor) subunit 9A               |
| <i>Ulk1</i>     | unc-51 like kinase 1                                                   |
| <i>Sorcs1</i>   | sortilin-related VPS10 domain containing receptor 1                    |
| <i>Xrcc2</i>    | X-ray repair complementing defective repair in Chinese hamster cells 2 |
| <i>Myo1e</i>    | myosin IE                                                              |
| <i>Aff3</i>     | AF4/FMR2 family, member 3                                              |
| <i>Tmem2</i>    | transmembrane protein 2                                                |
| <i>Uaca</i>     | uveal autoantigen with coiled-coil domains and ankyrin repeats         |

---

\*housekeeping genes
